# Supplementary material
Source: PubMed Central journal article supplement (PMC7642021)
Supplement: NIHMS1622288-supplement-1.pdf [file NIHMS1622288-supplement-1.pdf]

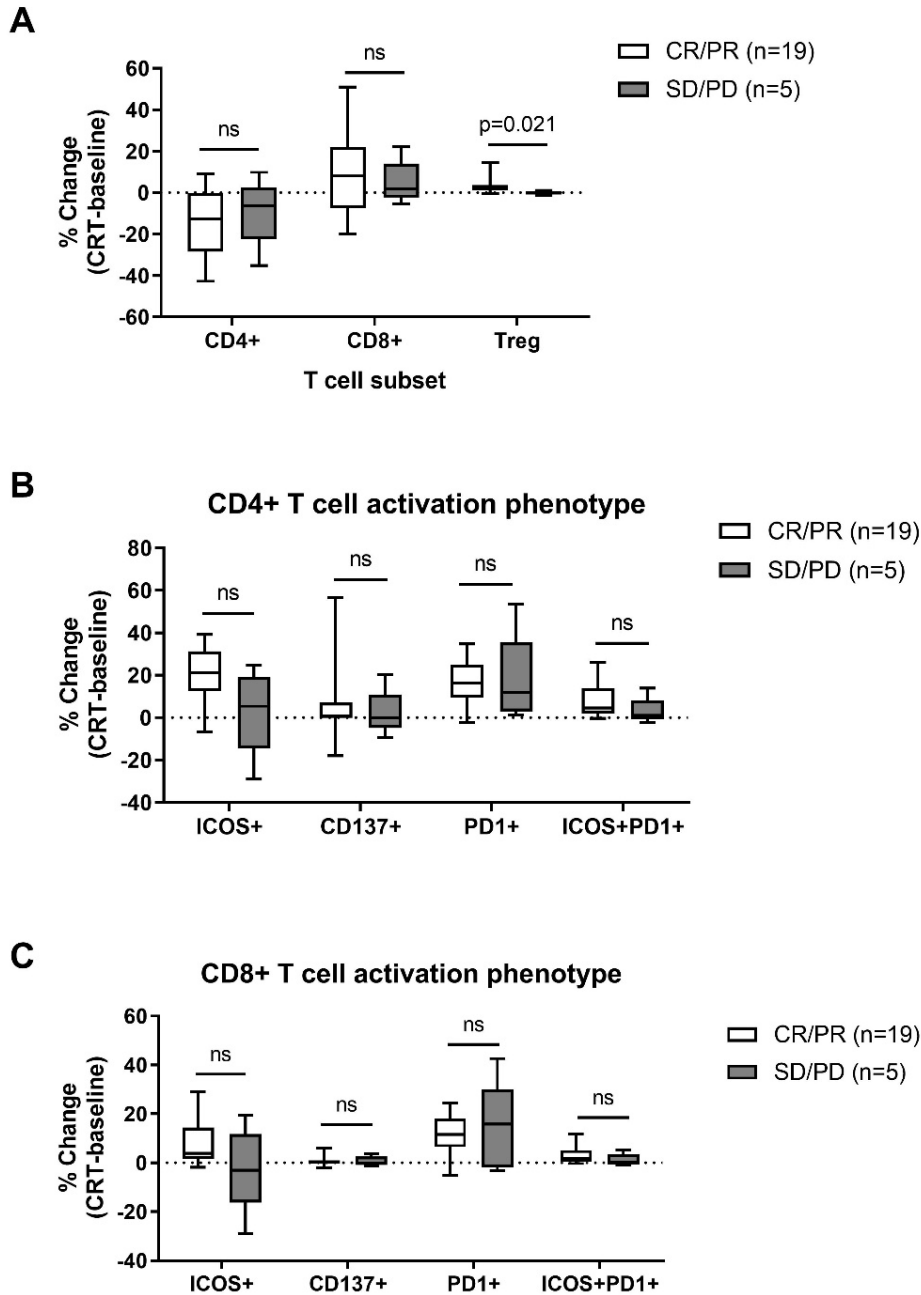

**Supplemental Figure S1. Association of T cell subsets and T cell activation status with clinical response.** Changes in the percentage of **(A)** T cell subpopulations, **(B)** activation markers on CD4+ T cells, and **(C)** activation markers on CD8+ T cells between baseline sampling and post-CRT treatment were correlated to objective clinical responses. Box-plots show 25<sup>th</sup> to 75<sup>th</sup> percentiles with median value indicated by horizontal line. Whiskers indicate minimum and maximum values. Significant differences are indicated by p-value (unpaired Mann-Whitney test). CR= complete response; PR= partial response; SD= stable disease; PD=progressive disease. ns, non-significant.
