# Supplementary material
Source: PubMed Central journal article supplement (PMC7642021)
Supplement: NIHMS1622288-supplement-2.pdf [file NIHMS1622288-supplement-2.pdf]

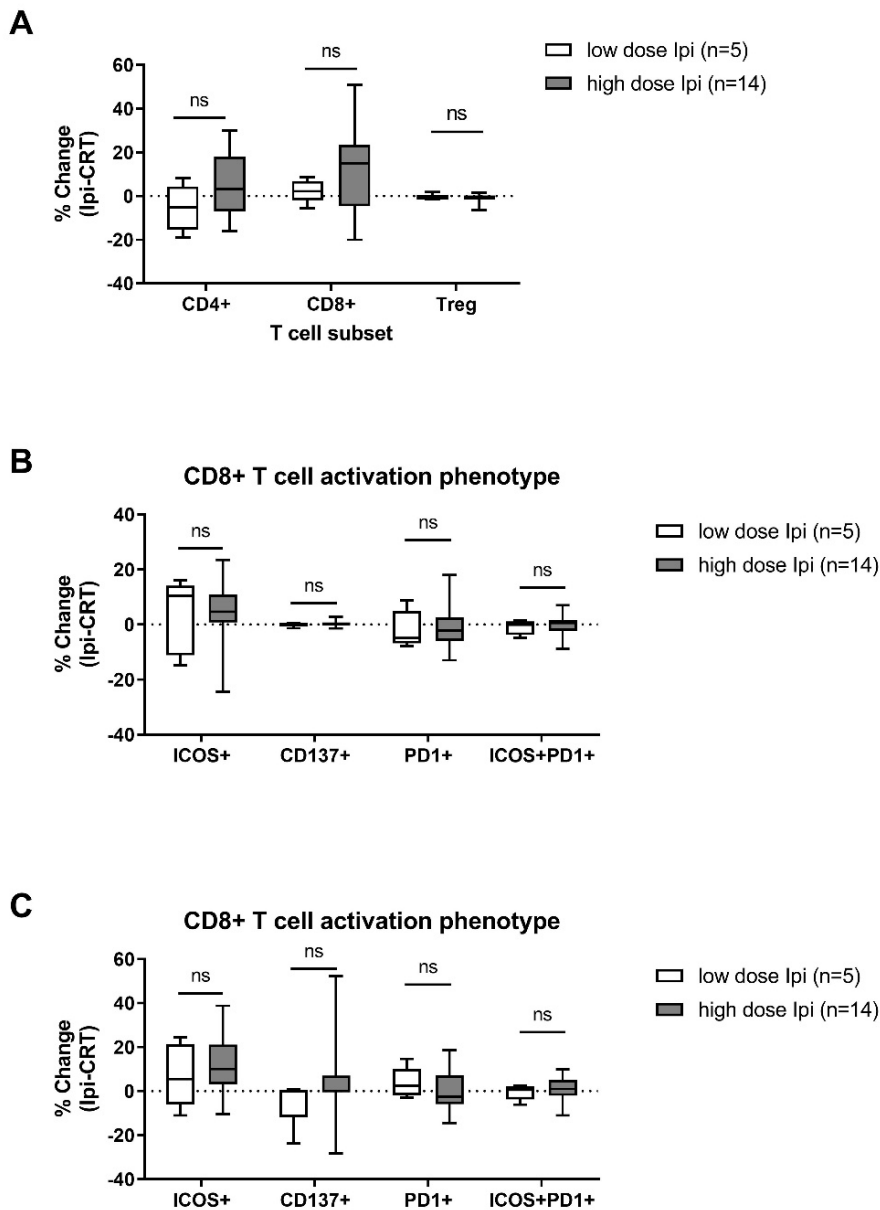

**Supplemental Figure S2. Association of T cell subsets and T cell activation status with dose level of ipilimumab.** Changes in the percentage of **(A)** T cell subpopulations, **(B)** activation markers on CD4+ T cells, and **(C)** activation markers on CD8+ T cells between post-CRT sampling and post-ipilimumab treatment were correlated to dose of ipilimumab. Box-plots show 25<sup>th</sup> to 75<sup>th</sup> percentiles with median value indicated by horizontal line. Whiskers indicate minimum and maximum values. Patients in low dose ipilimumab group received 4 cycles of 3 mg/kg or only 2 cycles of 10 mg/kg. Patients in high dose ipilimumab group received 4 cycles of 10 mg/kg. All comparisons were non-significant (unpaired Mann Whitney test).
