# Supplementary material
Source: PubMed Central journal article supplement (PMC7642021)
Supplement: NIHMS1622288-supplement-3.pdf [file NIHMS1622288-supplement-3.pdf]

**A**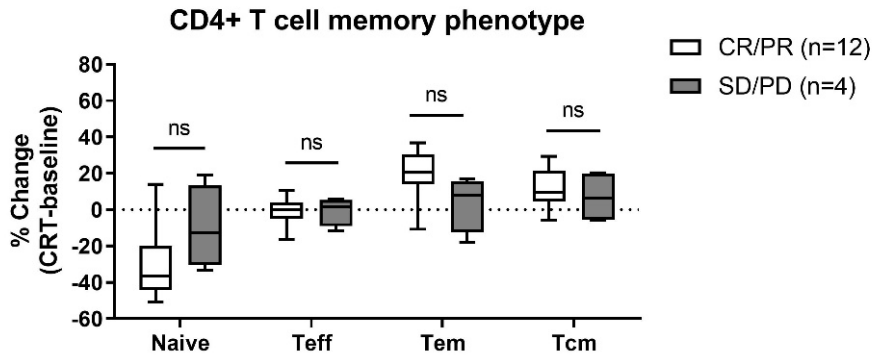**B**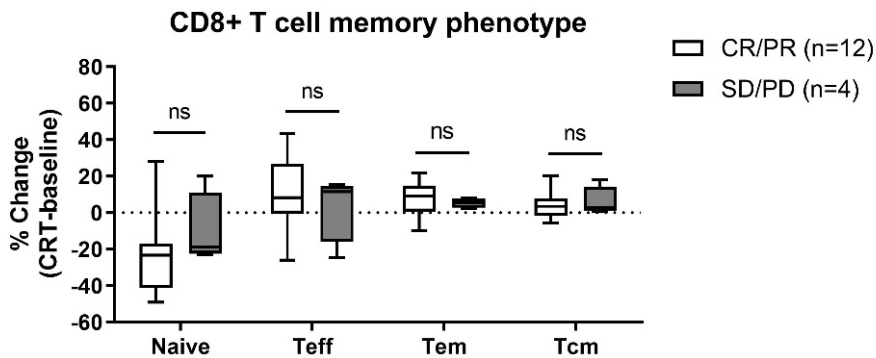

**Supplemental Figure S3. Association of changes in circulating T cell memory subsets with clinical response.** Changes in the percentage of **(A)** CD4 memory T cell subsets, **(B)** CD8 memory T cell subsets between baseline sampling and post-CRT treatment were correlated to objective clinical responses. Box-plots show 25<sup>th</sup> to 75<sup>th</sup> percentiles with median value indicated by horizontal line. Whiskers indicate minimum and maximum values. Significant differences are indicated by p-value (unpaired Mann-Whitney test). CR= complete response; PR= partial response; SD= stable disease; PD=progressive disease. ns, non-significant.
