# Supplementary material
Source: PubMed Central journal article supplement (PMC7642021)
Supplement: NIHMS1622288-supplement-4.pdf [file NIHMS1622288-supplement-4.pdf]

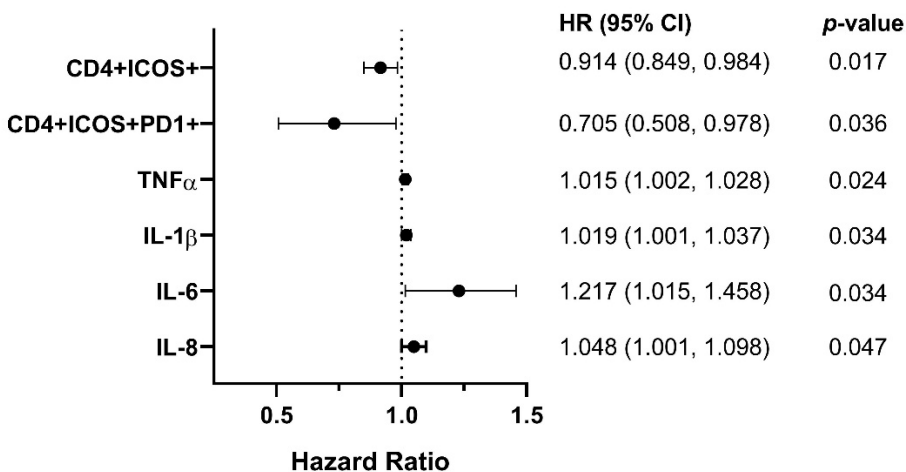

**Supplemental Figure S4. Association of changes in immune biomarkers with overall survival.** Increased changes (baseline to post-CRT values) in immune parameters were related to OS using adjusted Cox proportional hazards models. Figure shows hazard ratios with 95% confidence intervals (lower limit, upper limit) and associated p-values for statistically significant associations found for immune activation markers and plasma cytokines. Expansion of the CD4+ICOS+ and CD4+ICOS+PD-1+ subsets post-CRT are associated with clinical benefit while increases in inflammatory cytokines TNF $\alpha$ , IL-1 $\beta$ , IL-6, and IL-8 post-CRT are associated with increased risk of death. Nineteen PP and 5 ITT patients were included in immune phenotyping analysis. Twenty-one PP and 5 ITT patients were included in cytokine analysis.
