# Supplementary material
Source: PubMed Central journal article supplement (PMC7642021)
Supplement: NIHMS1622288-supplement-5.pdf [file NIHMS1622288-supplement-5.pdf]

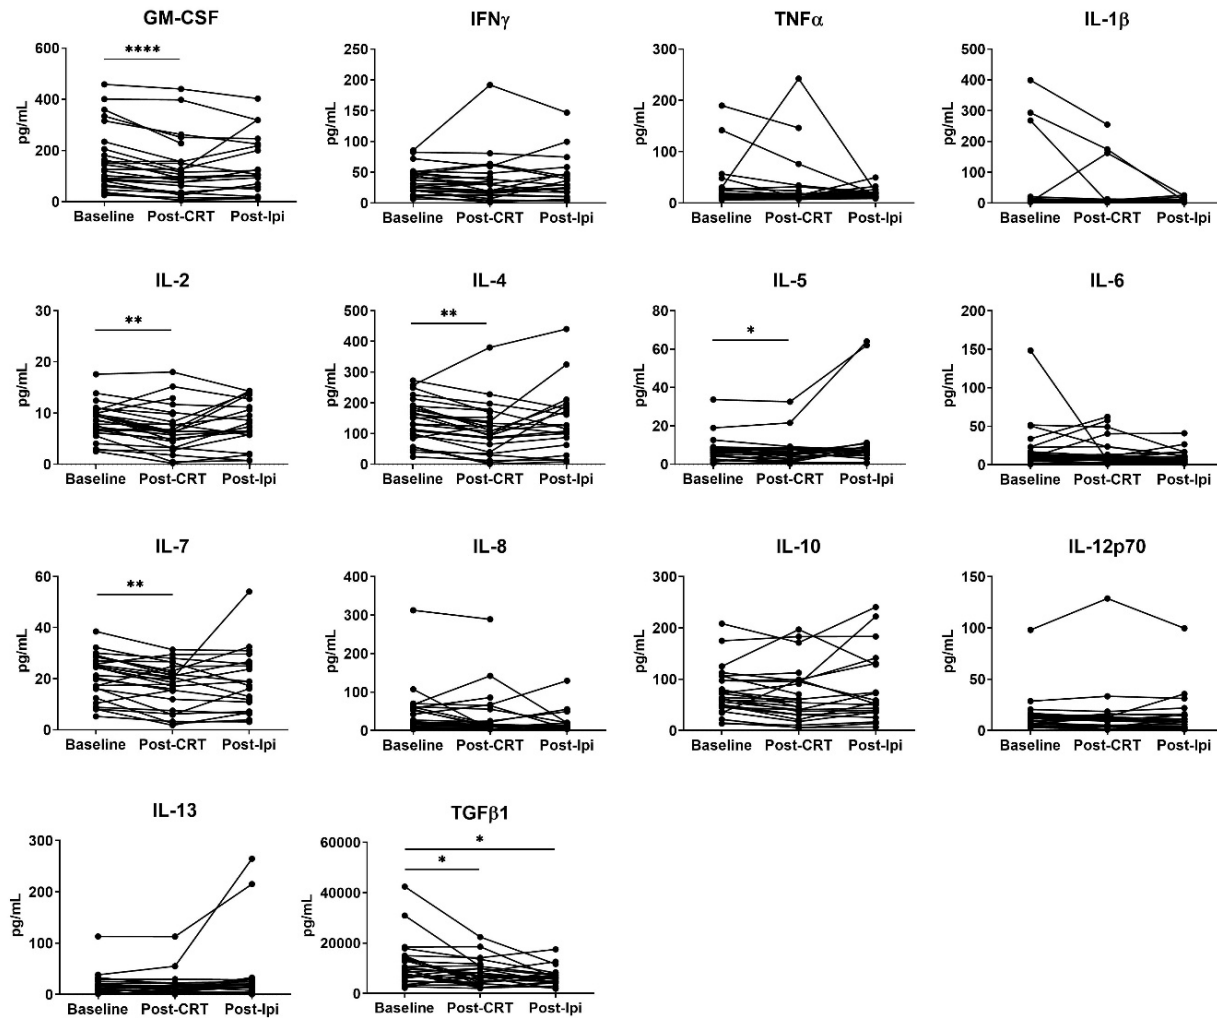

**Supplemental Figure S5. Circulating cytokine analysis of each patient from baseline, post-CRT and post-ipilimumab time points.** Plasma levels of growth factors, pro-inflammatory, Th1-associated, Th2-associated, and immunosuppressive cytokines were measured by cytokine multiplexing ELISA. Cytokine data were analyzed using a Mixed-effects multiple comparisons test, with the Geisser-Greenhouse correction for any missing data, followed by the Tukey's multiple comparisons test, with individual variances computed for each comparison (baseline vs. post-CRT, baseline vs. post-ipilimumab, post-CRT vs. post-ipilimumab). \* $p < 0.05$ , \*\* $p < 0.01$ , \*\*\*\* $p < 0.0001$ . All other comparisons were non-significant.
