# Supplementary material
Source: PubMed Central journal article supplement (PMC7642021)
Supplement: NIHMS1622288-supplement-6.pdf [file NIHMS1622288-supplement-6.pdf]

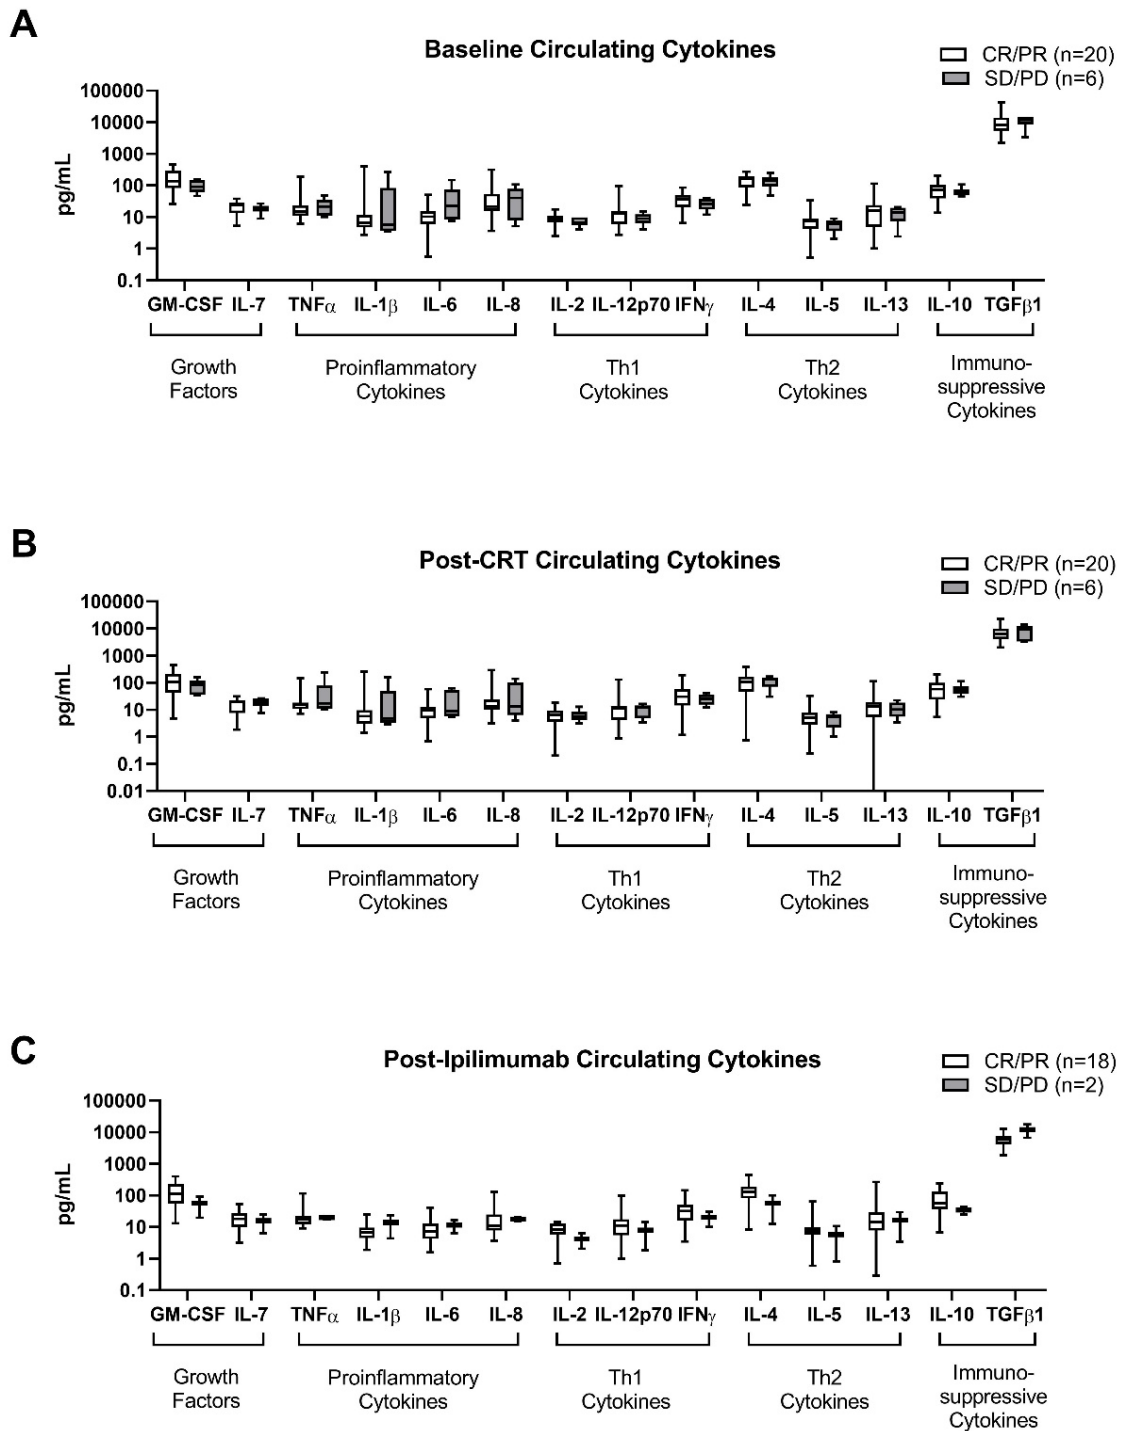

**Supplemental Figure S6. Association of circulating cytokine levels with objective clinical response.** Circulating plasma cytokines were measured from blood collected at (A) baseline, (B) post-CRT, and (C) post-ipilimumab using a multiplexing bead-based immunoassay. Levels of cytokines were correlated with overall clinical response. Box-plots show 25<sup>th</sup> to 75<sup>th</sup> percentiles with median value indicated by horizontal line. Whiskers indicate minimum and maximum values. CR= complete response; PR= partial response; SD= stable disease; PD=progressive disease. All comparisons were non-significant.
